# Supplementary material for: The association of serum immunoglobulin and complement levels and liver fibrosis and inflammation stage in patients with chronic hepatitis B
Source: Research Square preprint supplement (doi:10.21203/rs.3.rs-1541058/v1), 2022-04-13
Supplement: Supplementary file 1 [file 19f4d59f6ae06ddf9b5eef69.docx]

| **Table 1 Baseline characteristics of the patients (n=720)** | | | | | | | | | | | | |
| --- | --- | --- | --- | --- | --- | --- | --- | --- | --- | --- | --- | --- |
| **Variable** | **Fibrosis stage** | | | | **X²/F** | ***P*** | **Inflammation stage** | | | | **X²/F** | **P** |
| **0-1(n=205)** | **2(n=310)** | **3(n=144)** | **4(n=61)** | **0-1(n=103)** | **2(n=326)** | **3(n=238)** | **4(n=53)** |
| **Age (yr)** | 34.08±7.94 | 34.68±7.93 | 35.90±9.01 | 37.44±8.44 | 3.382 | 0.018 * | 36.48±8.90 | 34.30±8.01 | 35.12±8.11 | 35.76±8.69 | 2.063 | 0.104 |
| **Gender** | 141 (68.8%) | 204 (65.8%) | 107 (74.3%) | 46 (75.4%) | 4.554 | 0.208 | 73 (70.9%) | 223 (68.4%) | 161 (67.6%) | 41 (77.4%) | 2.155 | 0.541 |
| **HBeAg-positive (%)** | 119 (58.3%) | 187 (60.3%) | 79 (56.0%) | 38 (62.3%) | 1.049 | 0.789 | 39 (38.2%) | 195 (59.8%) | 159 (67.4%) | 30 (57.7%) | 25.160 | <0.001 ** |
| **ALT (IU/L)** | 82.90(36.90-161.50) | 134.50(59.00-270.25) | 155.45(68.88-358.00) | 142.00(63.00-375.00) | 33.83 | <0.001 ** | 40.70(25.00-81.45) | 97.50(50.18-193.00) | 203.00(98.25-421.75) | 341.00(180.00-1056.00) | 171.936 | <0.001 ** |
| **AST (IU/L)** | 42.00(27.00-84.00) | 69.50(39.25-125.00) | 100.00(45.75-196.75) | 104.00(42.00-232.00) | 57.014 | <0.001 ** | 27.90(20.80-41.45) | 52.00(34.55-95.00) | 117.00(57.25-211.25) | 168.00(110.00-457.00) | 207.689 | <0.001 ** |
| **GGT (IU/L)** | 31.00(20.00-54.00) | 42.00(24.00-71.00) | 60.50(30.00-120.50) | 75.00(40.00-124.00) | 61.044 | <0.001 ** | 25.00(17.50-38.00) | 35.00(23.00-61.00) | 59.50(30.25-110.25) | 98.00(61.00-167.00) | 128.265 | <0.001 ** |
| **ALB (g/L)** | 44.90(42.40-47.50) | 44.40(42.20-46.70) | 43.000(40.38-45.83) | 42.00(39.40-44.00) | 46.457 | <0.001 ** | 45.40(43.90-48.00) | 44.30(41.80-47.00) | 43.20(40.73-46.00) | 42.00(40.00-44.40) | 54.550 | <0.001 ** |
| **log**10 **HBV-DNA** | 6.88(3.78-8.08) | 6.92(5.16-8.03) | 7.06(5.65-7.95) | 6.55(5.51-7.72) | 5.176 | 0.159 | 4.28(2.92-7.08) | 6.57(4.74-7.88) | 7.50(6.175-8.23) | 7.60(6.35-7.95) | 66.245 | <0.001 ** |
| **PT (s)** | 13.40(12.83-13.80) | 13.50(13.00-14.00) | 13.80(13.20-14.38) | 14.30(13.55-14.80) | 45.717 | <0.001 ** | 13.30(12.70-13.78) | 13.40(12.90-13.90) | 13.80(13.20-14.35) | 14.30(13.500-14.80) | 60.930 | <0.001 ** |
| **C3 (g/L)** | 0.972(0.875-1.100) | 0.957(0.845-1.090) | 0.913(0.816-1.030) | 0.841(0.737-0.959) | 31.957 | <0.001 ** | 1.040(0.914-1.200) | 0.945(0.850-1.087) | 0.938(0.831-1.058) | 0.800(0.672-0.932) | 55.416 | <0.001 ** |
| **C4 (g/L)** | 0.196(0.157-0.242) | 0.184(0.144-0.221) | 0.167(0.136-0.198) | 0.160(0.123-0.183) | 34.851 | <0.001 ** | 0.219(0.174-0.256) | 0.180(0.146-0.219) | 0.170(0.137-0.208) | 0.147(0.122-0.196) | 49.560 | <0.001 ** |
| **IgG (g/L)** | 13.900(11.875-16.300) | 14.650(12.625-16.775) | 15.000(13.075-17.775) | 16.500(14.200-19.300) | 33.536 | <0.001 ** | 13.300(11.800-15.600) | 14.400(12.400-16.500) | 15.100(13.600-18.000) | 16.500(14.300-18.800) | 42.923 | <0.001 ** |
| **IgM (g/L)** | 1.090(0.815-1.433) | 1.130(0.851-1.500) | 1.120(0.806-1.710) | 1.210(0.874-1.610) | 2.925 | 0.403 | 1.080(0.834-1.400) | 1.070(0.822-1.440) | 1.200(0.863-1.650) | 1.130(0.874-1.650) | 6.535 | 0.088 |
| **IgA (g/L)** | 2.470(1.960-2.990) | 2.580(1.960-3.120) | 2.560(1.950-3.400) | 2.535(2.038-3.490) | 3.791 | 0.285 | 2.460(2.010-2.960) | 2.570(1.960-3.150) | 2.460(1.950-3.225) | 2.840(2.070-3.820) | 3.803 | 0.283 |
|  | **0-1(n=104)** | **2(n=146)** | **3(n=55)** | **4(n=21)** |  |  | **0-1(n=51)** | **2(n=162)** | **3(n=101)** | **4(n=12)** |  |  |
| **IgG1 (g/L)** | 8.680(7.610-9.883) | 9.505(8.460-11.325) | 9.730(8.640-11.900) | 12.400(10.600-14.600) | 31.275 | <0.001 ** | 8.450(7.325-9.765) | 9.145(7.955-10.400) | 10.600(9.080-13.100) | 11.600(9.985-12.475) | 42.281 | <0.001 ** |
| **IgG2 (g/L)** | 4.685(3.607-5.665) | 4.250(3.335-5.188) | 4.470(3.815-5.295) | 4.430(3.770-4.900) | 4.331 | 0.228 | 4.700(3.525-5.665) | 4.405(3.485-5.537) | 4.330(3.430-4.940) | 4.395(3.670-5.293) | 2.335 | 0.506 |
| **IgG3 (g/L)** | 0.541(0.364-0.761) | 0.485(0.335-0.691) | 0.557(0.391-0.761) | 0.597(0.420-0.856) | 3.122 | 0.373 | 0.514(0.347-0.759) | 0.510(0.362-0.739) | 0.541(0.356-0.739) | 0.745(0.445-1.170) | 3.012 | 0.390 |
| **IgG4 (g/L)** | 0.895(0.508-1.270) | 0.811(0.484-1.558) | 0.854(0.434-1.400) | 1.160(0.812-1.718) | 2.857 | 0.414 | 0.852(0.556-1.255) | 0.829(0.507-1.500) | 0.862(0.442-1.472) | 1.120(0.784-1.490) | 0.678 | 0.878 |
| ALT: alanine aminotransferase, AST: aspartate aminotransferase, GGT: gamma-glutamyl transpeptidase , ALB: albumin, PT: prothrombin time, C3:complement C3, C4:complement C4, IgG: immunoglobulin G, IgM: immunoglobulin M; IgA: immunoglobulin A  * *P*<0.05, ** *P*<0.01 | | | | | | | | | | | | |
